# Supplementary material
Source: PubMed Central journal article supplement (PMC3697510)
Supplement: AEM.00919-13_zam999104525so1.pdf [file AEM.00919-13_zam999104525so1.pdf]

## 1 **Materials and Methods**

2

3 **Bacterial strains, plasmids and culture conditions.** The bacterial strains and plasmids used  
4 in this study are detailed in Table S1. *Rhizobium* strains were grown at 28°C on either  
5 tryptone yeast extract (TY) (1), or Universal Minimal Salts (UMS) which is modified from  
6 previously described AMS (2) as follows; EDTA Na<sub>2</sub> 1 μM, CoCl<sub>2</sub>.6H<sub>2</sub>O 4 μM, CaCl<sub>2</sub>.2H<sub>2</sub>O  
7 510 μM and FeSO<sub>4</sub>.7H<sub>2</sub>O 40 μM. Antibiotics were used at the following concentrations (μg  
8 ml<sup>-1</sup>): streptomycin, 500 (Rlv3841); chloramphenicol 10 (ATCC14479); kanamycin, 20 (*E.*  
9 *coli*); tetracycline 10 (*E. coli*) or 2 (LMB134 and LMB136); spectinomycin 50; carbenicillin  
10 50, gentamicin 10, neomycin 80 .

11

12 **Mutation of *matA*, *matB* and *matC*.** Primers p1149/p1150 and p1152/p1153 (all primers  
13 listed in Table S2) were used to amplify internal gene fragments from *matA* (RL0990) and  
14 *matC* (RL0992) respectively from Rlv3841. The products were cloned into pK19mob, using  
15 HindIII sites incorporated into the primers forming pRU2027 and pRU2028 respectively.  
16 Plasmids pRU2027 and pRU2028 were conjugated into strain Rlv3841 and single cross-over  
17 insertions selected as previously described (3). Primers p1151 (*matA*) and p1154 (*matC*) were  
18 used with pK19A and pK19B to confirm the mutations. Primers pr0068/pr0069 and  
19 pr0071/pr0072 were used to amplify *matA* and *matC* respectively from ATCC14479. The  
20 products were cloned into pJET1.2/Blunt (Fermentas Inc) producing pLMB37 and pLMB38.  
21 Ω::Tc cassettes were cloned into unique StuI sites in pLMB37 and pLMB38, yielding  
22 pLMB39 and pLMB40. pLMB39 and pLMB40 were digested with SacI and XhoI/XbaI  
23 respectively and cloned into pJQ200SK, yielding pLMB47 and pLMB41. These plasmids  
24 were conjugated into ATCC14479 and cells plated on UMA (Universal Minimal Agar)  
25 supplemented with sucrose (10%) and tetracycline to select for gene replacement. Mutations  
26 in *matA* and *matC* were confirmed by PCR amplification using primers  
27 pr0070/pOTfarforward and pr0073/ pOTfarforward respectively. Primers pr1352/1353 and  
28 pr1354/1355 were used to amplify *matB* from Rlv3841 and ATCC14479. PCR products were  
29 cloned into pJET1.2/Blunt as described earlier resulting in plasmids pLMB638/pLMB639.  
30 Plasmid pLMB638 was digested with BmgBI to remove 244bp of *matB* of ATCC14479 and  
31 this was ligated with a SmaI digested ΩSp cassette, resulting in plasmid pLMB645. The BglII  
32 fragment from pLMB645 containing the ΩSp was cloned into the BamHI site of pJQ200SK,  
33 resulting in pLMB647. Plasmid pLMB639 was digested with AfeI to remove 386bp of *matB*  
34 of Rlv3841 and this was ligated to a SmaI digested ΩSp cassette, resulting in the plasmid

35 pLMB646. The PstI/XbaI fragment from pLMB646 was cloned into pJQ200SK, resulting in  
36 pLMB648. The plasmids pLMB647 and pLMB648 were conjugated into ATCC4479 and  
37 Rlv3841 and then plated onto UMA supplemented with sucrose (10%) and spectinomycin to  
38 select for gene replacement. Mutations in *matB* were confirmed by PCR amplification using  
39 primers pr1357/pOTfarforward and pr1356/ pOTfarforward respectively.

40

41

42 **Complementation of ATCC14479 malonate mutants.** Primers pr1313/pr1314, pr1313  
43 /pr1315 and pr1316/pr1317 were used to PCR amplify *matA*, *matAB* and *matC* respectively  
44 from ATCC14479. PCR products were digested with XbaI/BamHI and cloned into the  
45 promoterless broad host range plasmid pRU1097 (4), yielding pLMB605 (*matA*), pLMB610  
46 (*matAB*) and pLMB606 (*matC*) respectively. Another series of complementing clones  
47 containing *matA* and *matABC* were made in pBBR1MCS5 which has a *plac* promoter vector  
48 to drive expression of the genes. Primers pr1329/pr1330, pr1328/pr1330, pr1317/pr1360 were  
49 used to amplify *matC* , *matABC*, *matRABC* respectively. PCR products were BamHI/XbaI  
50 digested and cloned into pBBR1MCS5, resulting in pLMB628 (*matABC*), pLMB629 (*matC*)  
51 and pLMB654 (*matRABC*).

52

53 **Complementation of *matC* using p*Tau* vector.** Primers pr1358/1359 containing flanking  
54 NdeI/SacI sites were used to amplify *matC* from ATCC14479 and this was digested and  
55 cloned into pLMB509 yielding pLMB653. Plasmid pLMB509 contains a regulatable taurine  
56 promoter (5) allowing controlled expression of *matC*.

57

58 **Plant growth and acetylene reduction.** Pea seeds (*Pisum sativum* cv Avola) were surface  
59 sterilised and grown for 3-4 weeks in 1L vermiculate pots . White and red clovers were  
60 grown in 250ml pots (4 plants/pot) for 4-5 weeks. After growth, acetylene reduction was  
61 determined for plants incubated in 95% air and 5% acetylene for 1 h in 250-ml Schott bottles  
62 for peas and 100-ml Schott bottles for clover (6).

63

64

66 **TABLE S1. Bacterial strains and plasmids used in this study**

| Strain or plasmid                                           | Description                                                                                                                                  | Source/Reference        |
|-------------------------------------------------------------|----------------------------------------------------------------------------------------------------------------------------------------------|-------------------------|
| <i>R. leguminosarum</i><br>bv. <i>viciae</i> 3841           | St <sup>r</sup> derivative of <i>R. leguminosarum</i> bv. <i>viciae</i> strain<br>300, wild type strain                                      | (7)                     |
| <i>R. leguminosarum</i><br>bv. <i>trifolii</i><br>ATCC14479 | Cm <sup>r</sup> , wild type strain                                                                                                           | ATCC culture collection |
| <b>mat mutants</b>                                          |                                                                                                                                              |                         |
| RU4053                                                      | Rlv3841 <i>matA</i> ::pk19mob                                                                                                                | This study              |
| RU4054                                                      | Rlv3841 <i>matC</i> ::pk19mob                                                                                                                | This study              |
| LMB134                                                      | ATCC14479 <i>matA</i> :: ΩTc                                                                                                                 | This study              |
| LMB136                                                      | ATCC14479 <i>matC</i> :: ΩTc                                                                                                                 | This study              |
| LMB510                                                      | ATCC14479 <i>matB</i> :: ΩSp                                                                                                                 | This study              |
| LMB557                                                      | Rlv3841 <i>matB</i> :: ΩSp                                                                                                                   | This study              |
| <b>Plasmids</b>                                             |                                                                                                                                              |                         |
| pK19 mob                                                    | pUC19 derivative <i>lacZα</i> , mob; Km <sup>r</sup>                                                                                         | (8)                     |
| pJET1.2/Blunt                                               | PCR product cloning vector; Ap <sup>r</sup>                                                                                                  | Fermentas Inc           |
| pRU1097                                                     | Broad host range cloning vector ; Gm <sup>r</sup>                                                                                            | (4)                     |
| pBBR1MCS5                                                   | Broad host range cloning vector; Gm <sup>r</sup>                                                                                             | (9)                     |
| pLMB509                                                     | Taurine inducible vector                                                                                                                     | (5)                     |
| pHP45Ω                                                      | pBR322 derivatives with the Sp and Tc cassette; Ap <sup>r</sup><br>Sp <sup>r</sup> ; Ap <sup>r</sup> Tc <sup>r</sup>                         | (10)                    |
| pRK2013                                                     | ColEI replicon with RK2 <i>tra</i> genes, helper plasmid<br>used for mobilizing plasmids; Km <sup>r</sup>                                    | (11)                    |
| pJQ200SK                                                    | mob <sup>+</sup> <i>orip15A</i> , <i>lacZα</i> <sup>+</sup> <i>sacB</i> ; suicide vector; Gm <sup>r</sup>                                    | (12)                    |
| pRU2027                                                     | p1149-p1150 PCR product of Rlv3841 <i>matA</i><br>(RU0990) cloned into pK19 via BD cloning; Km <sup>r</sup>                                  | This study              |
| pRU2028                                                     | p1152-p1153 PCR product of Rlv3841 <i>matC</i><br>(RU0992) cloned into pK19 via BD cloning; Km <sup>r</sup>                                  | This study              |
| pLMB37                                                      | pr0068-0069 PCR product in pJET/Blunt; Ap <sup>r</sup>                                                                                       | This study              |
| pLMB38                                                      | pr0071-0072 PCR product in pJET/Blunt; Ap <sup>r</sup>                                                                                       | This study              |
| pLMB39                                                      | pLMB37 with ligated ΩTc cassette into <i>matA</i> gene<br>via StuI digestion to generate <i>matA</i> mutant; Ap <sup>r</sup> Tc <sup>r</sup> | This study              |
| pLMB40                                                      | pLMB38 with ligated ΩTc cassette into <i>matC</i> gene<br>via StuI digestion to generate <i>matC</i> mutant; Ap <sup>r</sup> Tc <sup>r</sup> | This study              |
| pLMB47                                                      | SacI fragment from pLMB39 cloned into pJQ200SK;<br>Gm <sup>r</sup> Tc <sup>r</sup>                                                           | This study              |
| pLMB41                                                      | XhoI/XbaI fragment from pLMB40 cloned into                                                                                                   | This study              |

|         |                                                                                                                                                   |            |
|---------|---------------------------------------------------------------------------------------------------------------------------------------------------|------------|
|         | pJQ200SK; Gm <sup>r</sup> Tc <sup>r</sup>                                                                                                         |            |
| pLMB605 | Xba/BamHI fragment from pLMB601 containing <i>matA</i> gene from ATCC14479 cloned into pRU1097; Gm <sup>r</sup>                                   | This study |
| pLMB606 | Xba/BamHI fragment from pLMB603 containing <i>matC</i> gene from ATCC14479 cloned into pRU1097; Gm <sup>r</sup>                                   | This study |
| pLMB610 | Xba/BamHI fragment from pLMB602 containing <i>matAB</i> gene from ATCC14479 cloned into pRU1097; Gm <sup>r</sup>                                  | This study |
| pLMB628 | XbaI/BamHI fragment containing <i>matC</i> gene from ATCC14479 cloned into pBBR1MCS5; Gm <sup>r</sup>                                             | This study |
| pLMB638 | pr1352-pr1353 PCR product containing <i>matB</i> from Rlv3841 cloned into pJET1.2 /Blunt; Ap <sup>r</sup>                                         | This study |
| pLMB639 | pr1352-pr1353 PCR product containing <i>matB</i> from ATCC14479 cloned into pJET1.2 /Blunt; Ap <sup>r</sup>                                       | This study |
| pLMB645 | pLMB638 with ΩSp cassette ligated into BmgBI site of <i>matB</i> to generate <i>matB</i> mutant in Rlv3841; Ap <sup>r</sup> Sp <sup>r</sup>       | This study |
| pLMB646 | pLMB639 with ΩSp cassette ligated into AfeI site of <i>matB</i> gene to generate <i>matB</i> mutant in ATCC14479; Ap <sup>r</sup> Sp <sup>r</sup> | This study |
| pLMB647 | BglII fragment from pLMB645 cloned into pJQ200SK BamHI site; Gm <sup>r</sup> Sp <sup>r</sup>                                                      | This study |
| pLMB648 | PstI/XbaI fragment from pLMB645 cloned into pJQ200SK; Gm <sup>r</sup> Sp <sup>r</sup>                                                             | This study |
| pLMB653 | pTau:: <i>matC</i> in pLMB509 ; Gm <sup>r</sup>                                                                                                   | This study |
| pLMB654 | Xba/BamHI fragment containing <i>matRABC</i> gene from ATCC14479 was cloned into pRU1097; Gm <sup>r</sup>                                         | This study |

---

67

68

69

70

71

72

73

74

75

77 **TABLE S2. Primers used in this study**

| Primer        | Sequence                                     |
|---------------|----------------------------------------------|
| p1149         | GACCATGATTACGCCAAGCTGACGCCGACTTCACGCATCTGTTC |
| p1150         | GACCTGCAGGCATGCAAGCTCGGGCCGTTTCGGATAAGAACC   |
| p1151         | CCGACCCAACAGAAAATACC                         |
| p1152         | GACCATGATTACGCCAAGCTCATCCACCCGGTCATGATGG     |
| p1153         | GACCTGCAGGCATGCAAGCTGATTGCTGCCTTCTGAGTCTTCG  |
| p1154         | TATACCAGGAGGTAAGGCGGCTGC                     |
| pr0068        | GCCCTCCAGTTCCGCCATAA                         |
| pr0069        | GGTCGAACTTCGACAGCAGG                         |
| pr0070        | AAGATGGTTCGGTTCCTA                           |
| pr0071        | ACGGCATGACGGAAACCAAT                         |
| pr0072        | ACCCGAATGGAATTGCGGTC                         |
| pr0073        | ATCGCCAAGCCCCGCGGTGC                         |
| pr1313        | AAATCTAGAGGGAGAGAACTCGTTGGAAA                |
| pr1314        | AAAGGATCCAGACAGGCGAGATAGAGGAT                |
| pr1315        | TTTGATCCTATTTTCGTTGGTTTTTCATCC               |
| pr1316        | TTTTCTAGAATGAAAAGGCCATCGTCAGC                |
| pr1317        | TTTGATCCTTTTCCACGTTTCCGTAATT                 |
| pr1328        | AAAGGATCCGGGAGAGAACTCGTTGGAAA                |
| pr1329        | TTTGATCCATGAAAAGGCCATCGTCAGC                 |
| pr1330        | TTTTCTAGATTTTCCACGTTTCCGTAATT                |
| pr1352        | TTTTCTGCAGACCAGGCGATTGAAAATTAC               |
| pr1353        | TTTTCTAGAGATCTGGTTGGTGATAACCGC               |
| pr1354        | TCACGCTATCGCCCGTTCCA                         |
| pr1355        | GATGCTGATCGGCGAGAAGC                         |
| pr1356        | ACCGCCAAGCTCGTCCGGAT                         |
| pr1357        | GCCTCTGCGCGGTTCGAATTT                        |
| pr1358        | TTTCATATGATGAAAAGGCCATCGTCAGC                |
| pr1359        | TTTGAGCTCTTTTCCACGTTTCCGTAATT                |
| pr1360        | AAATCTAGACATGCAAGGCAACTTCATTG                |
| pK19A         | ATCAGATCTTGATCCCCTGC                         |
| pK19B         | GCACGAGGGAGCTTCCAGGG                         |
| pOTfarforward | GACCTTTTGAATGACCTTA                          |

82

83 FIG S1 Growth of *Rhizobium* strains on malonate.

84

85

86

87

88

89

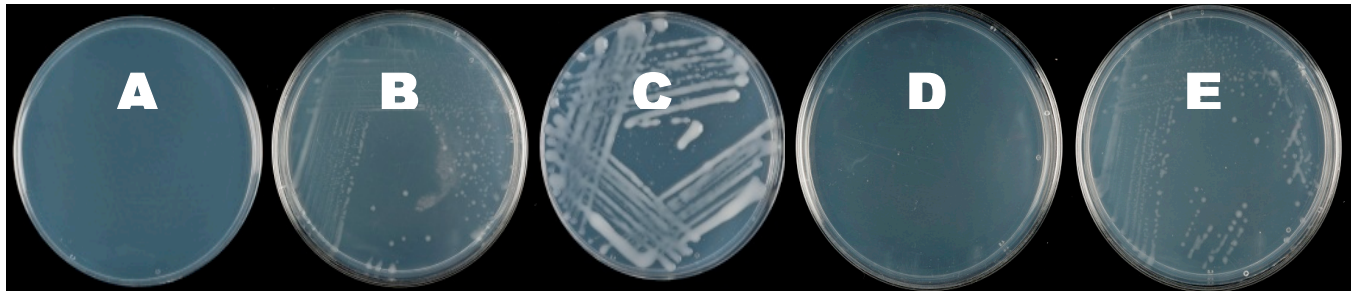

90 Growth measured on UMS supplemented with NH<sub>4</sub>Cl (10 mM) and carbon sources as stated.

91 Growth is scored as shown below. A, RU4053 (*matA*) on 5mM Malonate (-); B, Rlv3841

92 growth on 5mM Malonate (+); C, Rlv3841 on 20mM Succinate (++)

93 with complementing plasmid pLMB628 (*pmatABC*) on 5mM Malonate; E, LMB134 (*matA*)

94 with complementing plasmid pLMB654 (*pmatRABC*) on 5mM Malonate

FIG S2 Clover plants inoculated with *R. leguminosarum bv trifolii* wild type and mutant strains.

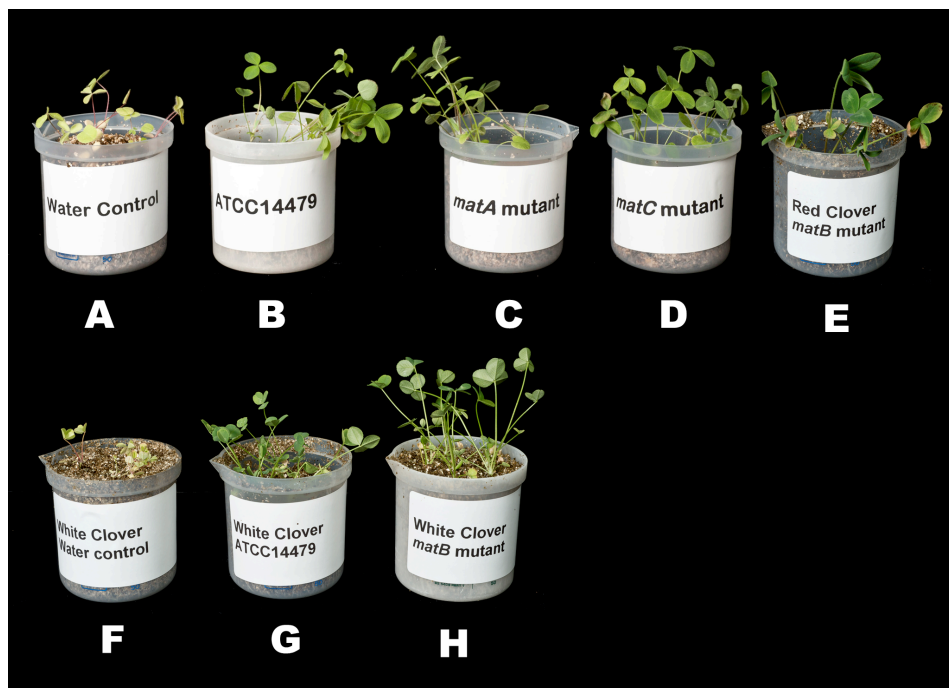

Red clover plants were grown for 4 weeks (A-D) or 5 weeks (E). White clover plants (F-G) were grown for 5 weeks. A, red clover uninoculated; B, red clover plus ATCC14479 (wild type); C, red clover plus LMB134 (*matA*); D, red clover plus LMB136 (*matC*); E, red clover plus LMB510 (*matB*); F, white clover uninoculated; G, white clover plus ATCC14479 (wild type); H, white clover LMB510 (*matB*).

1. **Beringer JE.** 1974. R factor transfer in *Rhizobium leguminosarum*. J. Gen. Microbiol. **84**:188-198.
2. **Poole PS, Schofield NA, Reid CJ, Drew EM, Walshaw DL.** 1994. Identification of chromosomal genes located downstream of *dctD* that affect the requirement for calcium and the lipopolysaccharide layer of *Rhizobium leguminosarum*. Microbiol. **140**:2797-2809.
3. **Karunakaran R, Ramachandran VK, Seaman JC, East AK, Moushine B, Mauchline TH, Prell J, Skeffington A, Poole PS.** 2009. Transcriptomic analysis of *Rhizobium leguminosarum* b.v. *viciae* in symbiosis with host plants *Pisum sativum* and *Vicia cracca*. J. Bacteriol. **191**:4002-4014.
4. **Karunakaran R, Mauchline TH, Hosie AHF, Poole PS.** 2005. A family of promoter probe vectors incorporating autofluorescent and chromogenic reporter proteins for studying gene expression in Gram-negative bacteria. Microbiol. **151**:3249-3256.
5. **Tett AJ, Rudder SJ, Bourdes A, Karunakaran R, Poole PS.** 2012. Regulatable vectors for environmental gene expression in alphaproteobacteria. Appl. Environ. Microbiol. **78**:7137-7140.
6. **Allaway D, Lodwig E, Crompton LA, Wood M, Parsons TR, Wheeler T, Poole PS.** 2000. Identification of alanine dehydrogenase and its role in mixed secretion of ammonium and alanine by pea bacteroids. Mol. Microbiol. **36**:508-515.
7. **Johnston AWB, Beringer JE.** 1975. Identification of the *Rhizobium* strains in pea root nodules using genetic markers. J. Gen. Microbiol. **87**:343-350.
8. **Schafer A, Tauch A, Jager W, Kalinowski J, Thierbach G, Puhler A.** 1994. Small mobilizable multipurpose cloning vectors derived from the *Escherichia coli* plasmids pK18 and pK19 - selection of defined deletions in the chromosome of *Corynebacterium glutamicum*. Gene **145**:69-73.
9. **Kovach ME, Elzer PH, Hill DS, Robertson GT, Farris MA, Roop JM, II, Peterson KM.** 1995. Four new derivatives of the broad-host-range cloning vectors pBBR1MCS, carrying different antibiotic-resistance cassettes. Gene **166**:175-176.
10. **Fellay R, Frey J, Krisch H.** 1987. Interposon mutagenesis of soil and water bacteria: a family of DNA fragments designed for *in vitro* insertional mutagenesis of gram-negative bacteria. Gene **52**:147-154.
11. **Figurski DH, Helinski DR.** 1979. Replication of an origin-containing derivative of plasmid RK2 dependent on a plasmid function provided in trans. Proc. Natl. Acad. Sci. U.S.A **76**:1648-1652.
12. **Quandt J, Hynes MF.** 1993. Versatile suicide vectors which allow direct selection for gene replacement in Gram-negative bacteria. Gene **127**:15-21.
